# Supplementary material for: BRAF V600E mutation and 9p21: CDKN2A/B and MTAP co-deletions - Markers in the clinical stratification of pediatric gliomas
Source: BMC Cancer. 2018 Dec 17;18:1259. doi: 10.1186/s12885-018-5120-0 (PMC6296141; doi:10.1186/s12885-018-5120-0)
Supplement: Supplementary file 1 — Table S1. Summary of the Clinical and Genetic Data of Glioma Cases. (XLSX 28 kb) [file 12885_2018_5120_MOESM1_ESM.xlsx]

## Sheet: Table S1
Supplemental Table 1 - Summary of the Clinical and Genetic Data of all Glioma Cases
Patient (case number)		Hospital	Age-range (years)	Gender	Location	Diagnosis	BRAF V600E Mutation	9p21 Chromosomal Region Deletion (9p21 region//centromer of chromosome 9) deletion	Follow-up	Survival since diagnosis (years)
67 Grade I Gliomas:
LGG1		HDE	> 8	F	Hypothalamus/ Optic Chiasm	Pilocityc Astrocytoma	Negative	ND	Alive, 2015	2
LGG2		IPO	> 8	F	Hypothalamus/ Optic Chiasm	Pilocityc Astrocytoma	Negative	ND	Alive, 2015	2
LGG3		HSM/IPO	< 3	M	Hypothalamus/ Optic Chiasm	Pilocityc Astrocytoma	Negative	ND	Alive, 2015	23
LGG4		IPO	< 3	F	Hypothalamus/ Optic Chiasm	Pilocityc Astrocytoma	Positive	ND	Alive, 2015	3
LGG5		IPO	3 to 8	F	Hypothalamus/ Optic Chiasm	Pilocityc Astrocytoma	Positive	Negative	Alive, 2015	17
LGG6		HSM	3 to 8	M	Hypothalamus/ Optic Chiasm	Pilocityc Astrocytoma	Negative	Positive	Loss of Follow-Up	-
LGG7		HSM	3 to 8	M	Diencephalon	Pilocityc Astrocytoma	Negative	Negative	Loss of Follow-Up	-
LGG8		HDE/IPO	3 to 8	F	Hypothalamus/ Optic Chiasm	Pilocityc Astrocytoma	Negative	ND	Alive, 2015	2
LGG9		IPO	> 8	F	Hypothalamus/ Optic Chiasm	Pilocityc Astrocytoma	Negative	ND	Alive, 2015	1
LGG10		HSM/IPO	> 8	M	Hypothalamus/ Optic Chiasm	Pilocityc Astrocytoma	Negative	Negative	Alive, 2015	6
LGG11		HSM	3 to 8	F	Cerebellum	Pilocityc Astrocytoma	Negative	Negative	Loss of Follow-Up	-
LGG12		HSM	3 to 8	M	Cerebellum	Pilocityc Astrocytoma	Negative	Positive	Loss of Follow-Up	-
LGG13		HSM	> 8	F	Cerebellum	Pilocityc Astrocytoma	Negative	Negative	Loss of Follow-Up	-
LGG14		HSM	3 to 8	F	Cerebellum	Pilocityc Astrocytoma	Negative	Negative	Loss of Follow-Up	-
LGG15		HSM	> 8	M	Cerebellum	Pilocityc Astrocytoma	Negative	Negative	Loss of Follow-Up	-
LGG16		HSM	3 to 8	M	Cerebellum	Pilocityc Astrocytoma	Negative	Negative	Loss of Follow-Up	-
LGG17		HSM	> 8	M	Cerebellum	Pilocityc Astrocytoma	Negative	Negative	Loss of Follow-Up	-
LGG18		HSM	3 to 8	M	Cerebellum	Pilocityc Astrocytoma	Negative	Negative	Loss of Follow-Up	-
LGG19		HSM/IPO	> 8	M	Cerebellum	Pilocityc Astrocytoma	Negative	Negative	Alive, 2015	1
LGG20		HSM	3 to 8	M	Cerebellum	Pilocityc Astrocytoma	Negative	Negative	Loss of Follow-Up	-
LGG21		HSM	> 8	F	Cerebellum	Pilocityc Astrocytoma	Negative	Negative	Loss of Follow-Up	-
LGG22		HDE	> 8	M	Cerebellum	Pilocityc Astrocytoma	Negative	Negative	Alive, 2015	3
LGG23		HSM	3 to 8	F	Cerebellum	Pilocityc Astrocytoma	Negative	Negative	Loss of Follow-Up	-
LGG24		HSM	> 8	M	Cerebellum	Pilocityc Astrocytoma	Negative	Negative	Loss of Follow-Up	-
LGG25		IPO	> 8	M	Cerebral Cortex	Pilocityc Astrocytoma	Positive	Negative	Alive, 2015	1
LGG26		HSM/IPO	> 8	F	Cerebral Cortex	Pilocityc Astrocytoma	Positive	Negative	Alive, 2015	3
LGG27		HSM	> 8	F	Cerebral Cortex	Pilocityc Astrocytoma	Positive	Negative	Loss of Follow-Up	-
LGG28		HSM	> 8	M	Cerebral Cortex	Pilocityc Astrocytoma	ND	Negative	Loss of Follow-Up	-
LGG29		IPO	3 to 8	F	Cerebral Cortex	Pilocityc Astrocytoma	Negative	Negative	Alive, 2015	19
LGG30		HSM	> 8	M	Cerebral Cortex	Pilocityc Astrocytoma	Negative	Negative	Loss of Follow-Up	-
LGG31		HDE	> 8	M	Cerebral Cortex	Pilocityc Astrocytoma	Negative	Negative	Loss of Follow-Up	-
LGG32		HSM	> 8	F	Cerebral Cortex	Pilocityc Astrocytoma	Negative	Negative	Loss of Follow-Up	-
LGG33		HSM	> 8	F	Diencephalon	Pilocityc Astrocytoma	Negative	Negative	Loss of Follow-Up	-
LGG34		IPO	3 to 8	F	Diencephalon	Pilocityc Astrocytoma	Negative	ND	Alive, 2015	4
LGG35		HSM/IPO	> 8	F	Diencephalon	Pilocityc Astrocytoma	Negative	Negative	Alive, 2015	1
LGG36		HDE	> 8	M	Diencephalon	Pilocityc Astrocytoma	Negative	ND	Alive, 2015	2
LGG37		IPO	> 8	M	Hippocampus	Pilocityc Astrocytoma	Negative	Positive	Alive, 2015	1
LGG38		HDE	3 to 8	M	Posterior Fossa	Pilocityc Astrocytoma	Negative	ND	Loss of Follow-Up	-
LGG39		IPO	> 8	M	Brainstem	Pilocityc Astrocytoma	Negative	ND	Alive, 2015	1
LGG40		IPO	3 to 8	F	Brainstem	Pilocityc Astrocytoma	Negative	ND	Alive, 2015	15
LGG41		IPO	3 to 8	F	Brainstem	Pilocityc Astrocytoma	Negative	ND	Alive, 2015	13
LGG42		HDE	3 to 8	M	Spinal Cord	Pilocityc Astrocytoma	Positive	ND	Loss of Follow-Up
LGG43		HDE	> 8	F	Spinal Cord	Pilocityc Astrocytoma	Negative	ND	Alive, 2015	3
LGG44		HDE/IPO	> 8	M	Unknown	Pilocityc Astrocytoma	Negative	Negative	Alive, 2014	1
LGG45		HSM	> 8	F	Unknown	Pilocityc Astrocytoma	Negative	Negative	Loss of Follow-Up	-
LGG46		IPO	3 to 8	F	Unknown	Pilocityc Astrocytoma	Negative	Positive	Alive, 2013	1
LGG47		IPO	3 to 8	M	Unknown	Pilocityc Astrocytoma	ND	Positive	Loss of Follow-Up	-
LGG48		IPO	3 to 8	F	Unknown	?Pilocityc Astrocytoma	ND	ND	Alive, 2015	2
LGG49		HDE	> 8	M	Unknown	Pilocityc Astrocytoma	Negative	ND	Loss of Follow-Up	-
LGG50		HDE	> 8	M	Posterior Fossa	Ganglioglioma	Negative	Negative	Loss of Follow-Up	-
LGG51		HSM/IPO	> 8	F	Cerebellum	Ganglioglioma	Negative	Negative	Alive, 2015	4
LGG52		HSM/IPO	> 8	M	IV ventricle	Ganglioglioma	Positive	Negative	Alive, 2015	5
LGG53		IPO	> 8	F	Cerebral Cortex	Ganglioglioma	Positive	Negative	Alive, 2015	1
LGG54		IPO	3 to 8	F	Cerebral Cortex	Ganglioglioma	Positive	Negative	Alive, 2015	6
LGG55		HSM	> 8	F	Cerebral Cortex	Ganglioglioma	Negative	Negative	Loss of Follow-Up	-
LGG56		HPC	> 8	F	Cerebral Cortex	Ganglioglioma	Negative	ND	Loss of Follow-Up	-
LGG57		HSM	> 8	F	Cerebral Cortex	Dysembryoplastic Neuroepithelial Tumor	Negative	Negative	Loss of Follow-Up	-
LGG58		HSM	> 8	M	Cerebral Cortex	Dysembryoplastic Neuroepithelial Tumor	Negative	Negative	Loss of Follow-Up	-
LGG59		HSM	> 8	M	Cerebral Cortex	Glioneuronal Tumor	Negative	Negative	Loss of Follow-Up	-
LGG60		HSM	< 3	M	Cerebral Cortex	Desmoplastic Infantile Ganglioma	Negative	Negative	Loss of Follow-Up	-
LGG61		IPO	< 3	F	Cerebral Cortex	Desmoplastic Infantile Ganglioma	ND	Negative	Alive, 2015	6
LGG62		HSM	> 8	M	Cerebral Cortex	Gangliocytoma	Negative	Negative	Loss of Follow-Up	-
LGG63		HSM	> 8	F	Cerebral Cortex	Gangliocytoma	ND	Negative	Loss of Follow-Up	-
LGG64		HSM	> 8	M	Cerebral Cortex	Subependymal Giant Cell Astrocytoma	Negative	Positive	Loss of Follow-Up	-
LGG65		HDE	3 to 8	M		Subependymal Giant Cell Astrocytoma	Negative	Negative	Loss of Follow-Up	-
LGG66		IPO	> 8	M	Unknown	Glioneuronal Tumor	Negative	Negative	Alive, 2015	1
LGG82		IPO/HSM	3 to 8	M	Cerebellum	Pilocityc Astrocytoma	Negative	ND	Death, 2010	14
11 Grade II Gliomas:
LGG68		IPO	3 to 8	F	Hypothalamus/ Optic Chiasm	Diffuse Astrocytoma	Positive	ND	Alive, 2015	20
LGG70		HSM/IPO	3 to 8	F	Diencephalon	Diffuse Astrocytoma	ND	Negative	Alive, 2015	6
LGG71		HSM/IPO	3 to 8	M	Diencephalon	Diffuse Astrocytoma	Negative	Negative	Alive, 2015	8
LGG72		HSM	3 to 8	F	Cerebellum	Diffuse Astrocytoma	Negative	Positive	Loss of Follow-Up	-
LGG73		HSM	> 8	F	Cerebellum	Pilomyxoid Astrocytoma	Negative	Positive	Loss of Follow-Up	-
LGG74		HDE	< 3	F	Unknown	Pilomyxoid Astrocytoma	Negative	Positive	Loss of Follow-Up	-
LGG75		HSM	> 8	M	Cerebral Cortex	Oligodendroglioma	Negative	Negative	Loss of Follow-Up	-
LGG76		HSM/IPO	3 to 8	M	Cerebral Cortex	Oligodendroglioma	Negative	Negative	Alive, 2015	8
LGG78		HSM/IPO	< 3	M	Cerebral Cortex	Oligodendroglioma	Negative	Negative	Loss of Follow-Up	-
LGG80		IPO/HSM	3 to 8	M	Diencephalon	Oligodendroglioma	Negative	Negative	Death, 2009	1
LGG81		IPO	3 to 8	F	Cerebral Cortex	Xanthoastrocytoma	Positive	Positive	Death, 2014	11
13 Grade III Gliomas:
HGG1		HSM/IPO	3 to 8	F	Brainstem	Anaplasic Oligoastrocytoma	Negative	Negative	Death, 2006	1
HGG2		HSM	3 to 8	M	Unknown	Anaplastic Glioneuronal Tumor	Negative	ND	Loss of Follow-Up	-
HGG5		HSM	< 3	M	Cerebral Cortex	Anaplastic Oligodendroglioma	Negative	Negative	Alive, 2015	7
HGG6		HSM	3 to 8	F	Cerebral Cortex	Anaplastic Oligodendroglioma	Negative	Negative	Alive, 2015	7
HGG7		HSM/IPO	3 to 8	M	Cerebral Cortex	Anaplastic Ganglioglioma	Negative	Negative	Loss of Follow-Up	3
HGG8		IPO/HSM	> 8	M	Cerebral Cortex	Anaplastic Astrocytoma	Negative	Negative	Death, 2011	1
HGG9		HSM	> 8	M	Cerebellum	Anaplastic Astrocytoma	Negative	Positive	Death, 2010	1
HGG10		HSM/IPO	> 8	F	Brainstem	Anaplastic Astrocytoma	Negative	Negative	Death, 2008	2
HGG11		HDE/IPO	3 to 8	M	Brainstem	Anaplastic Astrocytoma	Negative	ND	Death, 2013	1
HGG12		HDE/IPO	3 to 8	M	Brainstem	Anaplastic Astrocytoma	Negative	ND	Alive, 2015	1
HGG13		HDE	3 to 8	M	Brainstem	Anaplastic Astrocytoma	Positive	ND	Loss of Follow-Up	-
HGG14		HSM/IPO	> 8	M	Cerebral Cortex	Xanthoastrocytoma	Positive	Negative	Alive, 2013	1
9 Grade IV Gliomas
HGG3		HSM/IPO	3 to 8	M	Cerebral Cortex	Glioblastoma	Negative	Positive	Death, 2007	1
HGG15		HSM	> 8	M	Cerebral Cortex	Astroblastoma	Positive	Negative	Alive, 2015	6
HGG16		IPO	> 8	M	Cerebral Cortex	Astroblastoma	Negative	Negative	Alive, 2015	1
HGG17		HSM/IPO	> 8	M	Cerebral Cortex	Anaplastic Oligodendroglioma	Negative	Negative	Death, 2006	1
HGG18		HSM	> 8	M	Cerebral Cortex	Glioblastoma	Negative	Positive	Death, 2012	3
HGG19		HPC	> 8	F	Cerebral Cortex	Glioblastoma	Negative	Positive	Loss of Follow-Up	-
HGG20		HPC	3 to 8	M	Unknown	Glioblastoma	Negative	Negative	Loss of Follow-Up	-
HGG21		HSM	3 to 8	M	Brainstem	Glioblastoma	Negative	Positive	Loss of Follow-Up	-
HGG22		HDE	3 to 8	M	Brainstem	Brainstem Glioma	Negative	ND	Loss of Follow-Up	-
HGG23		IPO	> 8	F	Cerebral Cortex	Glioblastoma	Positive	Positive	Death, 2014	1

## Sheet: Legend - Table S1
	Legend - Supplemental Table 1
	ND	Not Done due to lack of material or quality
	F	Female
	M	Male
	HSM	Hospital Santa Maria, Lisbon, Portugal
	IPO	Portuguese Institute of Oncology of Lisbon, Portugal
	HDE	Hospital Dona Estefania, Lisbon, Portugal
	HPC	Hospital Pediátrico de Coimbra, Portugal
	Negative - Alteration not present
	Positive - Alteration present
